# Supplementary material
Source: MDPI journal article supplement (https://www.mdpi.com/2076-3417/12/5/2419)
Supplement: s1 [file s1]

## Supplementary Material

**Table S1.** Raman Spectroscopy Studies on Cervical Cells for Cervical Cancer Diagnosis.

| Authors                    | Year | Type of sample                                                       | n sample                                                                           | Contribution                                                                                                                                                                         |
|----------------------------|------|----------------------------------------------------------------------|------------------------------------------------------------------------------------|--------------------------------------------------------------------------------------------------------------------------------------------------------------------------------------|
| Krishna CM, et al., [41]   | 2007 | Formalin fixed cervical tissues<br>Laser line: 785 nm                | 9 normal, 9 stage IIIB malignant, 9 after radiation                                | Spectral differences in malignant vs normal cervical tissues                                                                                                                         |
| Rubina Shaik. et al., [42] | 2013 | Cervix tissue<br>Laser line: 785 nm                                  | 11 normal cervices<br>16 tumor tissues<br>13 tumor respondents to radiation tissue | Raman Spectroscopy Studies on Cervical Cells for Cervical Cancer Diagnosis<br>Differences normal vs tumor in amide I and amide III region.<br>Sensitivity 73.6%<br>Specificity 92.5% |
| Rubina Shaik. et al., [18] | 2013 | Exfoliated cell pellets<br>Laser line: 785 nm                        | 17/28 normal<br>20/29 cancer                                                       | Classification efficiency 90% / 84.5% abnormal tissue<br>Classification efficiency after RBC lysis treatment 79.3 / 78.7% abnormal tissue                                            |
| Rubina Shaik. et al., [43] | 2017 | In vivo cervical tissue<br>Laser line: 785 nm                        | 20 cervical tumor<br>6 normal                                                      | Sensitivity 91%<br>Specificity 96%<br>Positive predictive value 95%<br>Negative predictive value 93%                                                                                 |
| Kearney P. et al. [24]     | 2017 | Cervical exfoliation individual cells<br>Laser line: 532 nm          | 20 healthy and 50 HSIL                                                             | Raman spectral signatures<br>Sensitivity of 92%<br>Specificity of 97%                                                                                                                |
| Traynor D. et al. [19]     | 2018 | Cervical exfoliation individual cells<br>Laser line: 532 nm          | 15 healthy and 15 HSIL                                                             | Sensitivity 92%<br>Specificity 93%<br>For samples with no blood contamination<br>Treatment to remove the blood of samples                                                            |
| Zheng C. et al. [40]       | 2019 | Cervical Tissue<br>Laser line: 532 nm                                | 45 Adenocarcinoma<br>50 squamous cell carcinoma tissues                            | The precision of 93.125% in differentiation between the two types of cervical cancer                                                                                                 |
| Karunakaran et al., [24]   | 2020 | SiHa cells<br>Cervical exfoliated single cells<br>Laser line: 633 nm | CIN 1<br>CIN 2<br>CIN 3                                                            | AuNP 40-45 nm<br>Average diagnostic accuracy of 94%, 74% and 92% of the three clinical grades                                                                                        |

|                              |      |                                                                                                              |                                                                             |                                                                                                                                                                  |
|------------------------------|------|--------------------------------------------------------------------------------------------------------------|-----------------------------------------------------------------------------|------------------------------------------------------------------------------------------------------------------------------------------------------------------|
| Ceja-Fdez. Et al., .<br>[23] | 2021 | Formalin-fixed<br>paraffin preserved<br>(FFPP) cervical<br>tissue samples<br>Laser line: 785 nm              | 5 CIN1<br>5 CIN2<br>5 CIN 3                                                 | Cervical tissue + AuNP 13<br>nm<br>SERS<br>Spectral differences<br>between carcinoma vs HPV<br>infection                                                         |
| Karunakaran et al.,<br>[25]  | 2021 | SiHa cells<br>Wi38 cells<br>Cervical exfoliated<br>single cells<br>Laser line: 633 nm                        | 3 CIN2<br>3 CIN 3<br>3 normal                                               | SERS nanotag<br>for the simultaneous<br>detection of biomarkers<br>persisting in the<br>progression of squamous<br>cell carcinoma of human<br>cervix             |
| Current work                 | 2022 | Cervical exfoliation<br>Spectra of<br>cytoplasm and<br>nucleus of<br>individual cells.<br>Laser line: 532 nm | 81 sample,<br>Healthy, and<br>cervical lesions<br>(CIN1, CIN2,<br>CIN3/CIS) | Classification Efficiency<br>76.5% and 82.7%<br>(cytoplasm and nucleus)<br>Raman Spectra from<br>Individual cells of patient's<br>samples<br>Sensitivity (84.6%) |
